1                   **Phylogeographic model selection using convolutional neural networks**

2

3 Emanuel Masiero da Fonseca<sup>1\*</sup> (<https://orcid.org/0000-0002-2952-8816>)

4 Guarino R. Colli<sup>2</sup> (<https://orcid.org/0000-0002-2628-5652>)

5 Fernanda P. Werneck<sup>3</sup> (<https://orcid.org/0000-0002-8779-2607>)

6 Bryan C. Carstens<sup>1</sup> (<https://orcid.org/0000-0002-1552-227X>)

7

8 <sup>1</sup> Department of Evolution, Ecology and Organismal Biology, The Ohio State University, 318 W.

9 12<sup>th</sup> Ave, Columbus, OH 43210

10 <sup>2</sup> Departamento de Zoologia, Universidade de Brasília, Brasília, Brazil

11 <sup>3</sup> Coordenação de Biodiversidade, Programa de Coleções Científicas Biológicas, Instituto

12 Nacional de Pesquisas da Amazônia (INPA), Manaus, Brazil

13

14 \*Corresponding author: [emanuelmfonseca@gmail.com](mailto:emanuelmfonseca@gmail.com); Department of Evolution, Ecology and

15 Organismal Biology, The Ohio State University, 318 W. 12<sup>th</sup> Ave, Columbus, OH 43210

16

17 **Running Title:** Phylogeography and deep learning

## 18 **Abstract**

19           The field of phylogeography has evolved rapidly in terms of the analytical toolkit to  
20 analyze the ever-increasing amounts of genomic data. Despite substantial advances, researchers  
21 have not fully explored all potential analytical tools to tackle the challenge posed by the huge size  
22 of genomic datasets. For example, deep learning techniques, such as convolutional neural  
23 networks (CNNs), widely employed in image and video classification, are largely unexplored for  
24 phylogeographic model selection. In non-model organisms, the lack of information about their  
25 ecology, natural history, and evolution can lead to uncertainty about which set of demographic  
26 models should be considered. Here we investigate the utility of CNNs for assessing a large  
27 number of competing phylogeographic models using South American lizards as an example, and  
28 approximate Bayesian computation (ABC) to contrast the performance of CNNs. First, we  
29 evaluated three demographic scenarios (constant, expansion, and bottleneck) for each of four  
30 recovered lineages and found that the overall model accuracy was higher than 98% for all  
31 lineages. Next, we evaluated a set of 26 models that accounted for evolutionary relationships,  
32 gene flow, and changes in effective population size among these lineages and recovered an  
33 overall accuracy of 87%. In contrast, ABC was unable to single out a best fit model among 26  
34 competing models. Finally, we used the CNN model to investigate the evolutionary history of  
35 two South American lizards. Our results indicate the presence of hidden genetic diversity, gene  
36 flow between non-sister populations, and changes in effective population sizes through time,  
37 likely in response to Pleistocene climatic oscillations. Our results demonstrate that CNNs can be  
38 easily and usefully incorporated into the phylogeographer's toolkit.

39

40 **Keywords:** CNNs, deep learning, machine learning, *Norops* spp., phylogeography

## 41 **Introduction**

42           One key research goal of phylogeographic research has been to investigate how historical  
43 processes have shaped genetic variation across geographic space. In the early years of  
44 phylogeography, interpretations were highly qualitative and largely based on gene genealogies  
45 and the geographic distribution of the haplotypes. Because of their descriptive nature, such  
46 phylogeographic investigations were susceptible to overinterpretation (Knowles & Maddison,  
47 2002), where a detailed explanation of the causes of intraspecific diversification usually went  
48 beyond the evidence supported by the data, and confirmation bias (Nickerson, 1998), where  
49 researchers often interpreted new results in a manner that supported previous findings (Carstens  
50 et al., 2009). As the field matured, researchers recognized the importance of statistical approaches  
51 that explicitly incorporate uncertainty to draw meaningful conclusions about species'  
52 evolutionary history. Therefore, the identification of statistical models relevant for data analysis  
53 is a crucial step of any model-based phylogeographical investigation.

54           Phylogeographers have employed three general approaches to identify the models used to  
55 describe the data and make inference: (i) intuitive model identification; (ii) phylogeographic  
56 hypothesis testing; and (iii) objective model selection (Carstens et al., 2017). In the first  
57 approach, researchers use a particular evolutionary model to estimate a set of parameters of  
58 interest based on their expertise about the organism and its environment. Although this approach  
59 has enabled the evaluation of complex evolutionary processes, it can lead to unreliable estimates  
60 of the parameters of interest due to model misspecification (Koopman & Carstens, 2010).  
61 Biological intuition often drives the choice of the analytical framework(s) used to analyze the  
62 data. For example, researchers may choose to analyze their data with an isolation with migration  
63 model or an  $n$ -island migration model due to beliefs regarding the processes that have influenced

64 their system. In practice, if the chosen model has a poor fit to the evolutionary history of the  
65 organism, the resulting inferences can be misleading (Beerli & Palczewski, 2010; Hey et al.,  
66 2015). Unfortunately, the estimation of many evolutionary processes eventually becomes  
67 intractable in a likelihood framework (Beaumont, 2010; Beaumont et al., 2002), Therefore, no  
68 single analytical method can incorporate all possible evolutionary processes and use maximum  
69 likelihood or Bayesian methods to identify parameter values that maximize the probability of the  
70 model given the data. Hypothesis testing (e.g., Knowles et al., 2007) is conducted under an  
71 assumed model and, thus, subject to the same potential flaws as intuitive approaches. For these  
72 reasons, many researchers now utilize model selection approaches in phylogeographic research.

73         Simulation-based and likelihood-free approaches, which can accommodate complex  
74 demographic scenarios (Pritchard et al., 1999), are often used by researchers to conduct  
75 phylogeographic model selection. Software such as *ms* (Hudson, 2002), *msprime* (Kelleher et al.,  
76 2016), and *fastsimcoal2* (Excoffier et al., 2013) can be used to conduct coalescent simulations  
77 under customized demographic models that can approximate the details of almost any empirical  
78 system. After the simulation procedure, empirical and simulated datasets can be statistically  
79 evaluated using a variety of methods, including hypothesis testing (e.g., Knowles et al., 2007),  
80 Approximate Bayesian Computation (ABC; e.g., Fagundes et al., 2007), information theory (e.g.,  
81 Carstens et al., 2009), and machine learning approaches such as Random Forest (Smith et al.,  
82 2017). While these have in common the flexibility to assess multiple demographic models given  
83 the observed data, factors such as the type of data collected and details about the empirical  
84 system make it likely that there isn't a single "best" approach for all questions.

85         Information theoretic approaches can be conducted either on SNP data, summarized as  
86 site frequency spectra (SFS; e.g., Thomé & Carstens, 2016), or gene trees (e.g., Jackson et al.,

87 2017). Such approaches are effective at considering large numbers of models, but at the expense  
88 of parameter estimation. Approximate Bayesian Computation (ABC) remains a widely used  
89 approach in demographic model selection, but can potentially suffer from the “curse of  
90 dimensionality” when comparing more than a handful of demographic models (Pelletier &  
91 Carstens, 2014; Schrider & Kern, 2018). The computational effort of these approaches varies, but  
92 ABC becomes computationally expensive when the data are summarized on a locus by locus  
93 basis. For this reason, methods that summarize SNP data as SFS and use machine learning to  
94 identify the best model are increasingly being applied (e.g., Pudlo et al., 2016; Smith et al.,  
95 2017). As genomic data become easier to collect and more common in non-model systems,  
96 increased exploration of the usefulness of these (and other) approaches to phylogeographic model  
97 selection is warranted.

98

### 99 *Supervised Machine Learning*

100       Supervised machine learning (SML) is a branch of artificial intelligence that gives  
101 computers the ability to learn from data without being explicitly programmed and where labels  
102 (i.e., pre-classified data) are available for all the samples. SML involves (i) training a predictive  
103 model using a subset of a labeled dataset, (ii) evaluating the model using the remaining portion of  
104 the labeled dataset, and (iii) using the now-trained model to predict new, unlabeled examples.  
105 One example of a SML approach to phylogeographic inferences is implemented in the R package  
106 *delimitR* (Smith & Carstens, 2020), which uses a Random Forest classifier to create hundreds of  
107 individual decision trees (a forest) from SNP data, summarized using SFS, to train the model.  
108 Next, the set of decision trees are combined via a consensus tree, and this tree is used to classify a  
109 new dataset. Results from a simulation study indicate that *delimitR* is able to compare hundreds

110 of alternative models with high accuracy, even when comparing complex evolutionary scenarios.  
111 However, results in other fields that apply SML approaches indicate that Random Forest may not  
112 be as efficient as other approaches, such as convolutional neural networks (CNN; Box 1; Razzak  
113 et al., 2018). Since CNNs take as input a set of labeled images and train a model to predict the  
114 content of new images, one potential advantage of this approach is that data do not need to be  
115 summarized using standard genetic summary statistics or a SFS. Rather, prediction can be made  
116 directly from the alignment containing the genetic variation from sampled individuals (Flagel et  
117 al., 2019). CNNs have been used to address a range of biological questions, from detecting  
118 selective sweeps (Flagel et al., 2019) to predicting cancer outcomes (Mobadersany et al., 2018).  
119 In spite of all its benefits, the potential applicability of CNNs to phylogeographic model selection  
120 remains largely unexplored.

121 Here we explore the usefulness of CNNs for phylogeographic model selection. We use a  
122 simulation-based approach to create labeled examples (i.e., DNA alignments), converted to a  
123 black and white image by labeling the major allele as the ancestral state and the minor allele as a  
124 derived state. After training the model using 80% of the labeled data and evaluating its  
125 performance using the remaining 20% of the data, we compare the performance of CNNs and  
126 ABC to inquire about the evolutionary history of two species of lizards, from contrasting  
127 environments in South America.

128

## 129 **Box 1**

### 130 **Overview of Convolutional Neural Networks (CNNs)**

131 Artificial neural networks (ANNs) were proposed as an attempt to mimic the network of neurons  
132 that constitute the animal brain. In human brains, for example, an external stimulus is passed

133 through a chain of neurons that culminate in a response. Likewise, ANNs are fed with data (i.e.,  
134 stimulus) which are passed through an artificial network of neurons to make a prediction (i.e.,  
135 response). CNNs (also known as ConvNets) are a class of artificial neural networks that use a set  
136 of labeled images (input data) to build a model to differentiate among the various labels (e.g., a  
137 model able to differentiate between images of cats and dogs). First, the input images (Figure 1a)  
138 are transformed into arrays (Figure 1b), and then a convolution operation is performed by  
139 multiplying each value in the array by a learnable weight within a kernel (Figure 1c). After the  
140 convolution operation, the arrays are converted into a feature map (Figure 1d) where each value  
141 is passed through a non-linear function (e.g., ReLU, tanh, sigmoid). Next, a pooling method  
142 (maximum, average pooling, etc.) is applied to the feature maps within a kernel to reduce the  
143 dimensions of the feature maps and maintain conceivably important features from the  
144 convolutional kernel (Figure 1e). These steps can be replicated “n” times inside the CNN  
145 architecture. For example, in Figure 1, the convolutional and pooling steps were replicated twice.  
146 Lastly, the resulting array of all these operations is flattened into a one-dimensional array and  
147 fully connected to an ANN. Together, these steps comprise the forward propagation, in which the  
148 goal is to pass the data through the CNN (or ANN) and compute a loss function with respect to  
149 the weights. Once the loss function is computed, the CNN works backward (back-propagation) to  
150 optimize the weights and minimize the total loss function of the model using partial derivatives.  
151 In summary, a set of images is forward propagated into a CNN to calculate a loss function, which  
152 in turn is back-propagated to optimize the model weight and minimize the loss function. Thus,  
153 the training of a CNN consists of an iterative process of forward and backward propagation.  
154 Definitions of commonly used terms in this study are presented in Table 1 and a more detailed  
155 description of CNNs is available in Lecun et al. (2015) and Flagel et al. (2019).

156

## 157 **Material and Methods**

### 158 **South American lizards as a case study**

159         We used lizards as a case study to assess the usefulness of CNNs for phylogeographic  
160 model selection. Lizards are a diverse group of vertebrates, recognized as model organisms for  
161 evolutionary studies due to low thermal tolerance, relatively short generation times, and low  
162 dispersal rates (Camargo et al., 2010). For this study, we selected the sister species *Norops*  
163 *brasiliensis* and *N. planiceps* as targets for objective model selection. Little is known about their  
164 ecology, natural history, and evolution, which poses great uncertainty about which set of models  
165 are appropriate. *Norops brasiliensis* is a terrestrial and diurnal species that occurs predominantly  
166 in open areas in the Cerrado and enclaves of Cerrado in Amazonia (Figure 2; Avila-Pires, 1995;  
167 Ribeiro, 2015) (Figure 2). While *N. planiceps* is also terrestrial and diurnal, this species is  
168 endemic to northern Amazonia, inhabiting mainly “terra firme” forests, which are not  
169 periodically flooded (Figure 2; Avila-Pires, 1995; Ribeiro, 2015).

170         Amazonia and Cerrado are the largest Brazilian biomes, which together originally  
171 covered about 73% of the Brazilian territory. Amazonia is a region predominantly covered by  
172 tropical rainforests, whereas the Cerrado is a world hotspot priority for conservation (Myers et  
173 al., 2000), characterized by sclerophyllous, fire-adapted flora, abundant grasses and short, thick-  
174 barked, and twisted trees (savanna-like vegetation). The Cerrado is part of the South American  
175 diagonal of “open formations” (also known as “dry diagonal” or “savanna corridor”) and shares  
176 its north-western boundary with Amazonia.

177

### 178 **Sampling and data collection**



179 We obtained 61 tissue samples; 52 from *N. brasiliensis* (nine localities) and 9 from *N.*  
180 *planiceps* (five localities; Figure 1). Samples were obtained from the Herpetological Collection of  
181 Brasília University (CHUNB) and the Collections of Amphibians and Reptiles and Genetic  
182 Resources from the National Institute of Amazonian Research (INPA-H and INPA-HT).

183 We extracted DNA from liver or muscle tissues using E.Z.N.A. Tissue DNA Kit and  
184 prepared libraries from each species for sequencing using a modified version of the Genotyping-  
185 by-Sequencing (GBS) protocol described in Elshire et al. (2011). For DNA digestion, we used  
186 100 ng of freshly extracted DNA and the restriction enzyme Sbf1. After digestion–ligation  
187 reactions, we pooled all samples and purified using Agencourt AMPure beads. We amplified  
188 samples with polymerase chain reaction (PCR) as follows: (1) initial denaturation at 72 °C for 5  
189 min; (2) 16 cycles consisting of: 98 °C for 10 s for denaturation, 65 °C for 30 s for annealing, and  
190 72 °C for 30 s for extension; (3) final extension at 72 °C for 5 min. Then, we quantified PCR  
191 products using the BR DNA Qubit Quantification Kit. To select DNA fragments of 200–500 bp,  
192 we used the Blue Pippin Prep and carried out sequencing at the Ohio State University  
193 Comprehensive Cancer Center.

194

## 195 **Data processing**

196 We processed (sorted, demultiplexed, clustered, and formatted) raw data from Illumina  
197 outputs with ipyrad v 0.9.52 (Eaton & Overcast, 2020), using the resources provided by the Ohio  
198 Supercomputer Center. We processed five different datasets: (1) all samples; (2) *N. brasiliensis*  
199 (population 1); (3) *N. brasiliensis* (population 2); (4) *N. brasiliensis* (population 3); (5) *N.*  
200 *planiceps*. Datasets 2-5 represent distinct populations recovered in the population assignment  
201 analyses (see population assignment section). First, we demultiplexed raw data using individual

202 barcode adapters. Next, we filtered for adapters using the stricter option. We set the maximum  
203 low-quality base calls in the read 5, only allowing reads longer than 35 bp. We clustered reads  
204 within each sample if their similarity was greater than 85%, set the maximum cluster depth  
205 within samples to 10,000 reads, and used a minimum depth for statistical base calling of six  
206 reads. Because CNNs do not allow missing data (see CNN section), we removed loci with  
207 missing data.

208

### 209 **Population assignments**

210 We used STRUCTURE v2.3.4 (Pritchard et al., 2000) to partition samples into discrete  
211 populations before building demographic models. We ran three independent replicates using  
212 100,000 steps of burn-in, followed by 500,000 generations. We performed all runs under an  
213 admixture model for population ancestry and allele frequencies correlated among populations.  
214 We evaluated  $K$ -values ranging from 2 to 6, with ten replications. Using the ad hoc statistic  $\Delta K$ ,  
215 we evaluated the optimal value of  $K$ , calculating the rate of change in the log probability of data  
216 between successive  $K$  values (Evanno et al., 2005), as in STRUCTURE HARVESTER (Earl &  
217 vonHoldt, 2012). We combined all replicate analyses under the best value of  $K$  using the software  
218 CLUMPP (Jakobsson & Rosenberg, 2007), and assigned individuals to populations based on  
219 their admixture proportion. For example, if an individual was assigned jointly to two populations,  
220 we placed that individual in the population with the higher admixture proportion.

221

### 222 **Testing diversification history using convolutional neural networks**

223 In phylogeographic model selection, there are countless ways of parameterizing a model.  
224 As the number of lineages and possible parameters increase, the number of possible models

225 grows at a greater than exponential rate. For example, for the four populations we inferred based  
226 on the STRUCTURE results, there are more than 2,000 possible models when incorporating  
227 topology (four populations), gene flow (isolation vs secondary contact), and changes in  
228 population size (constant, bottleneck, and expansion). To facilitate comparison of all potential  
229 models, we divided the analysis in two parts. First, we independently tested each population for  
230 demographic change in population size through time (12 models). Second, we applied this model  
231 of population size change while testing models that consider all possible topologies for four tips  
232 and also various migration scenarios (26 models). With this approach, we reduced the model  
233 space from more than 2,000 to 38 competing models, which greatly facilitated the comparison  
234 between the CNN and ABC approaches to model selection (below).

235

### 236 *Testing population trajectory through time*

237 In the first part of model selection, we used a CNN to identify the population trajectory  
238 that best described the demographic history of each population. We defined three possible  
239 scenarios (Figure 2): (a) *constant population size through time*, (b) *population expansion since*  
240 *the last glacial maximum (LGM)*, and (c) *population bottleneck since the LGM*. We used the  
241 software fastsimcoal2 to simulate 10,000 data examples for each demographic scenario and  
242 population. We simulated short DNA sequences (5 bp) for 100,000 independent loci to ensure  
243 that the simulator only generated 1 SNP per locus and kept the same number of SNPs as observed  
244 in the empirical datasets. We parameterized the ancestral effective population size, current  
245 effective population size, and time of population size changing. All priors are presented in Table  
246 S1. Next, we wrote custom R scripts to convert the alignment of each simulation into a biallelic  
247 matrix, with  $n$  rows and  $k$  columns, corresponding to the number of samples and SNPs,

248 respectively. We labeled the major allele as the ancestral state (0) and the minor allele as the  
249 derived state (1), such that the matrix could be converted to a black and white image with each  
250 entry corresponding to a pixel in the image.

251 We implemented a two-dimensional CNN architecture as follows: a two-dimensional  
252 convolution layer (kernel = 3 x 1), a two-dimensional maximum pooling layer (kernel = 3 x 1), a  
253 two-dimensional convolution layer (kernel = 3 x 1), and a two-dimensional maximum pooling  
254 layer (kernel = 3 x 1). We then flattened the output layer from the last pooling. Next, we created a  
255 fully connected layer with 100 neurons, followed by one with 25 neurons, and a final layer with  
256 three neurons, which correspond to our three demographic models (i.e., constant, expansion, and  
257 bottleneck; Figure 3). For all layers, we used rectified linear unit activation functions (ReLU),  
258 except for the last one where we used a softmax function. This function is a generalization of the  
259 logistic function and used for multiclass prediction. We compiled the CNN using the Adam  
260 optimization procedure (Kingma & Ba, 2015), a categorical cross-entropy loss function, and a  
261 mini-batch size of 100. We ran the CNN for 10 epochs, although without any improvement after  
262 three epochs. We did not include a dropout layer because of the lack of evidence of overfitting.  
263 We trained the CNN using 80% of the simulated datasets and used the remaining 20% to evaluate  
264 model accuracy. Lastly, we used the trained model to predict the model that likely generated the  
265 empirical dataset. We built all CNNs with the Keras python library (<https://keras.io>).

266

### 267 *Testing evolutionary relationships and gene flow*

268 In the second part, we implemented a CNN architecture to assess the relationships among  
269 populations and gene flow between populations that showed evidence of admixture in  
270 STRUCTURE. We specified 26 demographic models, which comprise the combination of all 15

271 possible topologies along with scenarios of isolation after divergence or secondary contact that  
272 reflect our identification of individuals that are potentially admixed. For example, because we  
273 recovered substantial admixture between populations 2 and 3, we included models with potential  
274 secondary contact between these populations (see Figure 4). We did not include models with  
275 secondary contact when populations 2 and 3 were sister in the phylogenetic tree, because it was  
276 impractical to distinguish between isolation and secondary contact models in our preliminary  
277 runs. We used fastsimcoal2 to generate 10,000 data examples per model. As in the first part, we  
278 generated short DNA sequences of 5 bp for 100,000 independent loci in a way to simulate 1 SNP  
279 per locus. However, we only output the number of SNPs observed in the empirical dataset.  
280 Parameters in these models include ancestral and current population size, the time of population  
281 size changing, divergence time, migration rate, time of migration, and topology. Priors are  
282 available in Table S1. We converted alignments into images as described previously. In addition,  
283 because the relationship among populations is a key parameter in the models, images always  
284 presented populations in the same order: *N. brasiliensis* (population 1), *N. brasiliensis*  
285 (population 2), *N. brasiliensis* (population 3), and *N. planiceps*.

286 We used a simpler CNN architecture for the second part because it achieved a higher  
287 accuracy when compared to the CNN architecture used in the first part. We built the CNN using a  
288 two-dimensional convolution layer (kernel = 3 x 1), a two-dimensional maximum pooling layer  
289 (kernel = 3 x 1). After that, we flattened the output layer from the pooling and generated a fully  
290 connected layer with 500 neurons using the hyperbolic tangent function (tanh) for all layers,  
291 followed by our final layer with 26 neurons, corresponding to different models (Figure 5), where  
292 we used the softmax function. We compiled our model similar to the first part: Adam  
293 optimization and categorical cross-entropy loss function, but we used a mini-batch size of 50. We

294 trained the CNN for 5 epochs; but the model did not improve after the second epoch. Then we  
295 split simulations in training (80%) and test datasets (20%). Finally, we used the trained model to  
296 predict the empirical dataset. We used the python library Keras throughout to build the CNN.

297

## 298 **Model selection in an approximate Bayesian computation framework**

299 We also evaluated ABC performance for the second part of comparisons (from models 1  
300 to 26). First, we used the R-package “PipeMaster” to perform 100,000 simulations for each  
301 model to generate summary statistics (Gehara et al. in prep.;  
302 [www.github.com/gehara/PipeMaster](http://www.github.com/gehara/PipeMaster)). PipeMaster is a user-friendly R-package that builds  
303 demographic models and then simulates data under the coalescent process using *msABC* (Pavlidis  
304 et al., 2010). Demographic models mirrored empirical datasets with respect to the number of  
305 populations, the number of individuals within each population, and the number of loci. Priors  
306 used to build the models were the same used to construct CNNs models and are presented in  
307 Table S1. After simulations, we used the ABC approach to estimate model support using the  
308 “postpr” function implemented in “abc” R-package. We set the tolerance value to 1% and used  
309 the rejection method to compare models. We evaluate whether simulations produced summary  
310 statistics similar to the empirical dataset using PCAs.

311

## 312 **Results**

313

### 314 **Genomic data processing**

315 After genomic data processing, we obtained 4174 unlinked SNPs when all samples were  
316 combined, or 6860, 10931, 9396, and 12048 unlinked SNPs for the three *N. brasiliensis*

317 populations and *N. planiceps*, respectively. Because our CNN approach does not accommodate  
318 missing data, loci were required to be present in 100% of the samples.

319

## 320 **Population assignment**

321 The STRUCTURE analysis recovered four geographically structured populations that  
322 correspond to *N. planiceps* and three populations within *N. brasiliensis* (hereafter population 1,  
323 population 2, and population 3; Figure 2). While *N. planiceps* is distributed in northern  
324 Amazonia, population 1 is found in an enclave of Seasonally Dry Tropical Forests within  
325 Cerrado. Population 2 is more widespread in Cerrado and population 3 is found in lowlands  
326 within Cerrado. In addition, population assignment analysis revealed a region of high admixture  
327 between population 2 and 3 (locality #9).

328

## 329 **Demographic model selection**

330 We recovered population expansion as the best demographic scenario for *N. planiceps*,  
331 population 2, and population 3 with a probability of 0.99, 0.59, and 1.0, respectively (Table 2).  
332 For population 2, the lower probability value is likely related to the unaccounted gene flow with  
333 populations 3, which introduced a genetic variation that was not captured by the model.  
334 Conversely, for population 1, we found evidence of constant population size over time  
335 (probability = 0.985; Table 2). For all models within each population, the CNN model had a high  
336 accuracy when predicting the test set labels, reaching an accuracy higher than 99% for all models  
337 (Figure 4).

338 For the second part of model comparison, CNN recovered a single model (#22) as the best  
339 evolutionary scenario with a probability of 0.79 (Table 2). As expected, *N. planiceps* was

340 recovered as the sister species of *N. brasiliensis* and population 1 is more closely related to  
341 population 2 than to population 3. In addition, we found evidence of secondary contact between  
342 populations 2 and 3. The second-best model (model 26; probability = 0.20; Table 2) is similar to  
343 the best model but, in this scenario, population 1 is more closely related to population 3. All other  
344 scenarios had a probability of less than 1% (Table 2). Even comparing complex evolutionary  
345 histories, our CNN showed a high average accuracy: 87%; range: 62%–99%; Figure 5).  
346 Conversely, the posterior probabilities of ABC models were considerably lower. Models 16 and  
347 17 were the best models supported by this analysis, with a posterior probability of 15% each  
348 (Table 2). PCAs showed that most models produced summary statistics coincident with empirical  
349 datasets, indicating that the choice of priors was plausible (Figure S1).

350

## 351 **Discussion**

352 Our simulation testing implies that a deep learning approach for phylogeographic model  
353 selection can be very accurate for certain types of demographic processes. For example, the best  
354 CNN model had an accuracy of over 99% when testing for changes in effective population size  
355 through time in population 1 (i.e., constant, expansion, and bottleneck). We also found similar  
356 results for populations 2 and 3 (accuracy > 99%). Model accuracy was slightly lower for *N.*  
357 *planiceps*, likely caused by the small number of samples for this species. Model accuracy,  
358 therefore, seems to rely on the number of individuals and the number of SNPs. Even though we  
359 generated fewer SNPs for population 1, this model achieved higher accuracy than the one for *N.*  
360 *placeni* probably because we had twice the number of samples for population 1. For models 1  
361 to 26, the average accuracy was 87%. Undoubtedly, these models are more complex than those  
362 dealing only with changes in population size, given that all populations were compared



363 simultaneously, and we also included the relationships among them, gene flow between  
364 populations 2 and 3, and divergence times. Still, our approach reached an accuracy similar to  
365 other approaches. Conversely, ABC was unable to accurately find the best fit model, given the  
366 low posterior probability of all models (see Table 2).

367 CNN and ABC share many similarities, including the use of a simulation-based approach  
368 to generate new examples, given a demographic scenario and a set of priors. However, one of the  
369 main differences between these approaches is how they summarize the simulated datasets and,  
370 most importantly, how empirical and simulated datasets are compared. Therefore, a key feature  
371 of any of these methods is to be able to summarize the information in the data in a meaningful  
372 way. For ABC, a large number of summary statistics is usually calculated from the simulated  
373 datasets, e.g., Tajima's  $D$ , nucleotide diversity,  $F_{ST}$ , and Fu and Li's  $D$  and  $F$  statistics. Each  
374 summary statistic has been used in phylogeographic investigations. For example, Tajima's  $D$  is a  
375 summary statistic that detects departures from constant population sizes over time, including  
376 population expansion and bottleneck. In addition, fixation indexes have measured the degree of  
377 differentiation among populations. The choice of summary statistics is largely subjective, with  
378 most studies choosing not to identify a subset of summary statistics that maximize model  
379 probability. As stated by Beaumont et al. (2002), "*a crucial limitation of the rejection-sampling*  
380 *method is that only a small number of summary statistics can usually be handled*". Our results  
381 mirror those from previous research suggesting that ABC does not perform as well with large  
382 numbers of models (Pelletier & Carstens, 2014; Smith et al., 2017).

383 Although it is beyond the scope of this study to compare different methods of  
384 phylogeographic model selection, a broadly comparison of the accuracy of these approaches can  
385 be made based on our approach. For example, PHRAPL summarizes data using gene trees and

386 because of that, incomplete lineage sorting (ILS) is one of the main sources of model selection  
387 inaccuracy (Jackson et al., 2017). At shallower divergence times, a more pronounced discordance  
388 in gene trees can be observed and, consequently, it is more difficult to identify the evolutionary  
389 scenario that gives birth to the data. Similarly, for CNNs, as the divergence times decreases  
390 among lineages the model accuracy decreases, which likely results from ILS (Blischak et al.,  
391 2020). As noted above, conventional ABC approaches can attain high accuracy with a high  
392 number of models, but this potential liability can be alleviated. For example, Smith et al. (2017)  
393 proposed a Random Forest approach to test 15 evolutionary scenarios for a land snail endemic to  
394 the Pacific Northwest of North America and compare the Random Forest classifier with ABC.  
395 Their overall errors using Random Forest were 7.67% (range: 0–42%) and ~30% for ABC. The  
396 overall error of our CNN was 13%, but we noticed that most misclassification was between  
397 models that only differed on the presence or absence of secondary contact. Since Smith et al.  
398 (2017) did not include gene flow in the tested models, we subset our models and trained a CNN  
399 only with isolation models (models 1 to 15). The overall error was 1.5% (0.75–3%; Figure S2)  
400 and the best model had a probability of 87%. In a more recent study, Smith & Carstens (2020)  
401 applied Random Forest to the reticulate taildropper slug (*Prophysaon andersoni*) and found an  
402 average error of 5.2% when comparing 208 demographic models. These results show that CNN  
403 has an accuracy comparable to the best results reported for other methods (i.e., ABC with  
404 Random Forest). Unfortunately, the comparison between CNN and AIC-based methods (such as  
405 PHRAPL) is not straightforward because they use different frameworks to measure model  
406 performance. In particular, AIC-based approaches to model selection lack the built-in approach  
407 for assessing model accuracy (i.e., identifiability) that deep learning approaches such as CNN and  
408 ABC with Random Forest include.

409           One advantage of CNNs is that researchers are absolved of the requirement to summarize  
410 their data using summary statistics. Since there exists a set of statistics that is likely best used  
411 with a particular demographic history, this is particularly challenging for investigations into non-  
412 model systems. In our system (*N. planiceps* and *N. brasiliensis*) and others, there is a scarcity of  
413 *a priori* ecological and evolutionary information that limits the ability of researchers to specify a  
414 small set of candidate models and choose appropriate summary statistics. In such a scenario,  
415 approaches such as CNNs, PHRAPL, and delimitR offer the potential to compare among a large  
416 number of competing alternatives models without the need to make choices that are likely to  
417 influence the outcome. That is not to say that CNN approaches require the data to be summarized  
418 as we have done here. For example, Blischak et al. (2020) used CNNs to detect hybridization in  
419 simulated and an empirical system from *Heliconius* butterflies. They simulated chromosome-  
420 scale data for four species and generated images based on the pairwise Nei's genetic distance  
421 among populations. Their approach was found to be more accurate than approaches that were  
422 based on introgression-specific summary statistics.

423           Our approach was computationally more demanding than the one proposed by Blischak et  
424 al. (2020). It requires an average of two seconds to run the simulation in *fastsimcoal2* and eight  
425 seconds to process the image (~ 10 seconds from simulation to generate an image). Since we  
426 simulated 10,000 examples per model, it would take about 27 hours to simulate the images that  
427 correspond to one scenario. It required 10 hours to run one epoch in the comparison among 26  
428 models (208,000 training images and 52,000 test images), but this time can be optimized by using  
429 Graphical Processing Unit (GPU) instead of Central Processing Unit (CPU). Although the  
430 simulation and CNN were performed using the resources provided by the Ohio Supercomputer  
431 Center, we used a Mac mini (1.6 GHz Intel Core i5, 8 GB RAM, 2 cores) to generate these

432 reference values to provide context for potential users of this approach who do not have access to  
433 supercomputing centers. By far the biggest computational hurdle was the number of images  
434 storage in the Supercomputer. Our analysis used a total of 380,000 images.

435

#### 436 *Evolutionary history of South American lizards*

437 Pleistocene climate change has been proposed as one of the main drivers of speciation at  
438 higher latitudes (Burbrink et al., 2016; Hewitt, 2000, 2004). The Pleistocene refugia hypothesis  
439 (PRH) posits that species had to inhabit favorable refugia to persist and thrive under the new  
440 environmental conditions (Vanzolini & Williams, 1970). In South America, Haffer (1969) and  
441 Vanzolini & Williams (1970) almost simultaneously proposed the PRH to explain patterns of  
442 species diversity and distribution in the Amazon rainforest, where climate oscillations led to a  
443 series of contraction events of rainforests and expansions of dry vegetations during glacial  
444 periods, which would enable allopatric speciation of the associated biota. While this has been a  
445 popular hypothesis, many investigations have dismissed the Pleistocene refugia model based on  
446 multiple biological and paleoenvironmental sources of evidence (Bush & Oliveira, 2006; Lessa et  
447 al., 1997; Thomé et al., 2010; Wang et al., 2017). Cheng et al. (2013), based on speleothem  
448 oxygen isotope records, proposed an alternative speciation model for the Late Pleistocene in  
449 South America, in which a quasi-dipolar precipitation pattern during the Pleistocene would  
450 respond for differences in biodiversity between western and eastern Amazonia. In particular,  
451 eastern Amazon, which is more connected to the historical and current climate in the Cerrado,  
452 held desynchronized interleaved periods of wet and dry climates during the last 250 thousand  
453 years (kyr) with western Amazonia. These climatic patterns resulted in habitat fragmentation that  
454 isolated species that were previously broadly distributed and led to decreased gene flow and

455 increased genetic differentiation. Some community-level analyses suggest that this model is  
456 broadly applicable (Gehara et al., 2017; Silva et al., 2019). In contrast, climate was more stable in  
457 western Amazon, which is hypothesized to have generated the observed higher levels of  
458 biodiversity across multiple taxonomic groups and likely population stability through time.

459 Our phylogeographic model selection results support the quasi-dipolar scenario of Cheng  
460 et al. (2013). We found support for population expansion in *N. planiceps* and populations 2 and 3.  
461 While our results showed that population 1 was constant in size through time, this population is  
462 located in an enclave of Caatinga within Cerrado (Paraná valley). Caatinga is the largest nucleus  
463 of Seasonally Dry Tropical Forests (SDTF) and characterized by xeric vegetation, high  
464 seasonality, and unpredictable droughts. It is hypothesized that the climatic oscillations during  
465 the Pleistocene led the expansion and connection of now disjunct SDTFs (the Pleistocenic Arc  
466 Hypothesis - PAH; Prado & Gibbs, 1993; Pennington et al., 2000). This hypothesis is supported  
467 by the disjunct distribution of plants and animals as well as molecular data (Lanna et al., 2018;  
468 Pennington et al., 2000; Werneck & Colli, 2006). However, the exact time of the PAH is  
469 uncertain and the SDTFs could have expanded earlier, during the transition between Pliocene and  
470 Pleistocene, and have fragmented before the Last Glacial Maximum (Werneck et al., 2011),  
471 which could explain the stable population sizes we recovered in the longer term.  
472 In addition to climatic oscillations, the pattern of diversification found by our study mirrors the  
473 current taxonomic status of both species, though we found a hidden genetic diversity within *N.*  
474 *brasiliensis*. The pattern of divergence among lineages within *N. brasiliensis* follows a southeast-  
475 northwest pattern of differentiation, which is shared with other squamates in Cerrado (Guarnizo  
476 et al., 2016; Prado et al., 2012; Santos et al., 2014). This pattern of differentiation was likely  
477 driven by landscape features and climatic conditions.

478 *Conclusion*

479           Deep learning techniques have been successfully used in fields like medical sciences and  
480 agriculture, but their usage in evolutionary biology has just begun (but see Blischak et al., 2020;  
481 Flagel et al., 2019; Schrider & Kern, 2018). Our results showed that CNNs can be an effective  
482 and promising approach for phylogeographic model selection. We showed that a DNA alignment  
483 can be used as the source of comparison of a large number of models, without the need of genetic  
484 summary statistics. Also, our approach revealed a complex evolutionary scenario among lizards  
485 distributed in contrasting environments in South America, which involves hidden genetic  
486 diversity, gene flow between non-sister populations, and changes in effective population size  
487 through time. Finally, we encourage future investigations to compare the relative performance of  
488 different approaches for phylogeographic model selection.

489

490 **Acknowledgements**

491 We thank members of the Carstens Lab for comments and suggestions on the manuscript and  
492 Lisa N. Barrow and Megan L. Smith for lab assistance. We thank Ohio Supercomputer Center for  
493 computing resources. We thank curators and managers of the INPA-H and INPA-HT (C. Ribas,  
494 M. Freitas, A. Silva) for granting and processing samples under their care. EMF thanks the  
495 Coordenação de Aperfeiçoamento de Pessoal de Nível Superior (CAPES) for his doctoral  
496 fellowship (process #88881.170016/2018). FPW thanks Conselho Nacional de Desenvolvimento  
497 Científico e Tecnológico (CNPq) for her productivity fellowship (process #305535/2017-0).  
498 GRC thanks CAPES, CNPq, Fundação de Apoio à Pesquisa do Distrito Federal – FAPDF and the  
499 USAID’s PEER program under cooperative agreement AID-OAA-A-11-00012 for financial  
500 support.

501

502 **Author Contributions**

503 EMF and BCC conceived the ideas and designed methodology; EMF conducted the lab work and  
504 conducted the analyses. All authors interpreted the results and participated in the writing of the  
505 manuscript and gave final approval for submission.

506

507 **References**

- 508 Avila-Pires, T. C. S. (1995). Lizards of Brazilian Amazonia (Reptilia: Squamata). *Zoologische*  
509 *Verhandelingen*, 299, 1–706.
- 510 Beaumont, M. A. (2010). Approximate Bayesian computation in evolution and ecology. *Annual*  
511 *Review of Ecology, Evolution, and Systematics*, 41, 379–406.  
512 <https://doi.org/10.1146/annurev-ecolsys-102209-144621>
- 513 Beaumont, M. A., Zhang, W., & Balding, D. J. (2002). Approximate Bayesian computation in  
514 population genetics. *Genetics*, 162(4), 2025–2035. [https://doi.org/10.1111/j.1937-](https://doi.org/10.1111/j.1937-2817.2010.tb01236.x)  
515 [2817.2010.tb01236.x](https://doi.org/10.1111/j.1937-2817.2010.tb01236.x)
- 516 Beerli, P., & Palczewski, M. (2010). Unified framework to evaluate panmixia and migration

- 517 direction among multiple sampling locations. *Genetics*, 185(1), 313–326.  
518 <https://doi.org/10.1534/genetics.109.112532>
- 519 Blischak, P. D., Barker, M. S., & Gutenkunst, R. N. (2020). Chromosome-scale inference of  
520 hybrid speciation and admixture with convolutional neural networks. *BioRxiv*,  
521 2020.06.29.159673. <https://doi.org/10.1101/2020.06.29.159673>
- 522 Burbrink, F. T., Chan, Y. L., Myers, E. A., Ruane, S., Smith, B. T., & Hickerson, M. J. (2016).  
523 Asynchronous demographic responses to Pleistocene climate change in Eastern Nearctic  
524 vertebrates. *Ecology Letters*, 19(12), 1457–1467. <https://doi.org/10.1111/ele.12695>
- 525 Bush, M. B., & Oliveira, P. E. de. (2006). The rise and fall of the Refugial Hypothesis of  
526 Amazonian speciation: a paleoecological perspective. *Biota Neotropica*, 6(1).  
527 <https://doi.org/10.1590/s1676-06032006000100002>
- 528 Camargo, A., Sinervo, B., & Sites, J. W. (2010). Lizards as model organisms for linking  
529 phylogeographic and speciation studies. *Molecular Ecology*, 19(16), 3250–3270.  
530 <https://doi.org/10.1111/j.1365-294X.2010.04722.x>
- 531 Carstens, B. C., Morales, A. E., Jackson, N. D., & O’Meara, B. C. (2017). Objective choice of  
532 phylogeographic models. *Molecular Phylogenetics and Evolution*, 116(April), 136–140.  
533 <https://doi.org/10.1016/j.ympev.2017.08.018>
- 534 Carstens, B. C., Stoute, H. N., & Reid, N. M. (2009). An information-theoretical approach to  
535 phylogeography. *Molecular Ecology*, 18(20), 4270–4282. <https://doi.org/10.1111/j.1365-294X.2009.04327.x>
- 536
- 537 Cheng, H., Sinha, A., Cruz, F. W., Wang, X., Edwards, R. L., D’Horta, F. M., Ribas, C. C.,  
538 Vuille, M., Stott, L. D., & Auler, A. S. (2013). Climate change patterns in Amazonia and  
539 biodiversity. *Nature Communications*, 4, 1411. <https://doi.org/10.1038/ncomms2415>
- 540 Csilléry, K., François, O., & Blum, M. G. B. (2012). Abc: An R package for approximate  
541 Bayesian computation (ABC). *Methods in Ecology and Evolution*, 3(3), 475–479.  
542 <https://doi.org/10.1111/j.2041-210X.2011.00179.x>
- 543 Earl, D. A., & vonHoldt, B. M. (2012). STRUCTURE HARVESTER: A website and program for  
544 visualizing STRUCTURE output and implementing the Evanno method. *Conservation*  
545 *Genetics Resources*, 4(2), 359–361. <https://doi.org/10.1007/s12686-011-9548-7>
- 546 Eaton, D. A. R., & Overcast, I. (2020). ipyrad: Interactive assembly and analysis of RADseq  
547 datasets. *Bioinformatics*, 36(8), 2592–2594. <https://doi.org/10.1093/bioinformatics/btz966>
- 548 Elshire, R. J., Glaubitz, J. C., Sun, Q., Poland, J. A., Kawamoto, K., Buckler, E. S., & Mitchell,  
549 S. E. (2011). A robust, simple genotyping-by-sequencing (GBS) approach for high diversity  
550 species. *PLoS ONE*, 6(5), e19379. <https://doi.org/10.1371/journal.pone.0019379>
- 551 Excoffier, L., Dupanloup, I., Huerta-Sánchez, E., Sousa, V. C., & Foll, M. (2013). Robust  
552 Demographic Inference from Genomic and SNP Data. *PLoS Genetics*, 9(10).  
553 <https://doi.org/10.1371/journal.pgen.1003905>
- 554 Fagundes, N. J. R., Ray, N., Beaumont, M., Neuenschwander, S., Salzano, F. M., Bonatto, S. L.,  
555 & Excoffier, L. (2007). Statistical evaluation of alternative models of human evolution.  
556 *Proceedings of the National Academy of Sciences of the United States of America*, 104(45),  
557 17614–17619. <https://doi.org/10.1073/pnas.0708280104>
- 558 Flagel, L., Brandvain, Y., & Schrider, D. R. (2019). The unreasonable effectiveness of  
559 convolutional neural networks in population genetic inference. *Molecular Biology and*  
560 *Evolution*, 36(2), 220–238. <https://doi.org/10.1093/molbev/msy224>
- 561 Gehara, M., Garda, A. A., Werneck, F. P., Oliveira, E. F., da Fonseca, E. M., Camurugi, F.,



- 562 Magalhães, F. de M., Lanna, F. M., Sites, J. W., Marques, R., Silveira-Filho, R., São Pedro,  
563 V. A., Colli, G. R., Costa, G. C., & Burbrink, F. T. (2017). Estimating synchronous  
564 demographic changes across populations using hABC and its application for a  
565 herpetological community from northeastern Brazil. *Molecular Ecology*, 26(18), 4756–  
566 4771. <https://doi.org/10.1111/mec.14239>
- 567 Guarnizo, C. E., Werneck, F. P., Giugliano, L. G., Santos, M. G., Fenker, J., Sousa, L.,  
568 D'Angiolella, A. B., dos Santos, A. R., Strüßmann, C., Rodrigues, M. T., Dorado-  
569 Rodrigues, T. F., Gamble, T., & Colli, G. R. (2016). Cryptic lineages and diversification of  
570 an endemic anole lizard (Squamata, Dactyloidae) of the Cerrado hotspot. *Molecular*  
571 *Phylogenetics and Evolution*, 94, 279–289. <https://doi.org/10.1016/j.ympev.2015.09.005>
- 572 Haffer, J. (1969). *Speciation in Amazonian forest birds*. 165(3889), 131–137.
- 573 Hewitt, G. (2000). The genetic legacy of the Quaternary ice ages. *Revue Des Maladies*  
574 *Respiratoires*, 405(4), 907–913.
- 575 Hewitt, G. (2004). Genetic consequences of climatic oscillations in the Quaternary. *Philosophical*  
576 *Transactions of the Royal Society B: Biological Sciences*, 359(1442), 183–195.  
577 <https://doi.org/10.1098/rstb.2003.1388>
- 578 Hey, J., Chung, Y., & Sethuraman, A. (2015). On the occurrence of false positives in tests of  
579 migration under an isolation-with-migration model. *Molecular Ecology*, 24(20), 5078–5083.  
580 <https://doi.org/10.1111/mec.13381>
- 581 Hudson, R. R. (2002). Generating samples under a Wright-Fisher neutral model of genetic  
582 variation. *Bioinformatics*, 18(2), 337–338. <https://doi.org/10.1093/bioinformatics/18.2.337>
- 583 Jackson, N. D., Morales, A. E., Carstens, B. C., & O'Meara, B. C. (2017). PHRAPL:  
584 Phylogeographic Inference Using Approximate Likelihoods. *Systematic Biology*, 66(6),  
585 1045–1053. <https://doi.org/10.1093/sysbio/syx001>
- 586 Jakobsson, M., & Rosenberg, N. A. (2007). CLUMPP: A cluster matching and permutation  
587 program for dealing with label switching and multimodality in analysis of population  
588 structure. *Bioinformatics*, 23(14), 1801–1806.  
589 <https://doi.org/10.1093/bioinformatics/btm233>
- 590 Kelleher, J., Etheridge, A. M., & McVean, G. (2016). Efficient Coalescent Simulation and  
591 Genealogical Analysis for Large Sample Sizes. *PLoS Computational Biology*, 12(5), 1–22.  
592 <https://doi.org/10.1371/journal.pcbi.1004842>
- 593 Kingma, D. P., & Ba, J. L. (2015). Adam: A method for stochastic optimization. *ArXiv Preprint*  
594 *ArXiv*, 1412.6980.
- 595 Knowles, L. L., Carstens, B. C., & Keat, M. L. L. (2007). Coupling Genetic and Ecological-  
596 Niche Models to Examine How Past Population Distributions Contribute to Divergence.  
597 *Current Biology*, 17(11), 940–946. <https://doi.org/10.1016/j.cub.2007.04.033>
- 598 Knowles, L. L., & Maddison, W. P. (2002). Statistical Phylogeography. *Molecular Ecology*,  
599 11(12), 2623–2635.
- 600 Koopman, M. M., & Carstens, B. C. (2010). Conservation genetic inferences in the carnivorous  
601 pitcher plant *Sarracenia alata* (Sarraceniaceae). *Conservation Genetics*, 11(5), 2027–2038.  
602 <https://doi.org/10.1007/s10592-010-0095-7>
- 603 Lanna, F. M., Werneck, F. P., Gehara, M., Fonseca, E. M., Colli, G. R., Sites, J. W., Rodrigues,  
604 M. T., & Garda, A. A. (2018). The evolutionary history of *Lygodactylus* lizards in the South  
605 American open diagonal. *Molecular Phylogenetics and Evolution*, 127(August), 638–645.  
606 <https://doi.org/10.1016/j.ympev.2018.06.010>

- 607 Lecun, Y., Bengio, Y., & Hinton, G. (2015). Deep learning. *Nature*, *521*(7553), 436–444.  
608 <https://doi.org/10.1038/nature14539>
- 609 Lessa, E. P. ., Van Valkenburgh, B. ., & Fariña, R. A. (1997). Testing hypotheses of differential  
610 mammalian extinctions subsequent to the Great American Biotic Interchange.  
611 *Palaeogeography, Palaeoclimatology, Palaeoecology*, *135*, 157–162.
- 612 Mobadersany, P., Yousefi, S., Amgad, M., Gutman, D. A., Barnholtz-Sloan, J. S., Velázquez  
613 Vega, J. E., Brat, D. J., & Cooper, L. A. D. (2018). Predicting cancer outcomes from  
614 histology and genomics using convolutional networks. *Proceedings of the National  
615 Academy of Sciences of the United States of America*, *115*(13), E2970–E2979.  
616 <https://doi.org/10.1073/pnas.1717139115>
- 617 Myers, N., Mittermeier, R. A., Mittermeier, C. G. ., da Fonseca, G. A. B. ., & Kent, J. (2000).  
618 Biodiversity hotspots for conservation priorities. *Nature*, *403*, 853–858.
- 619 Nickerson, R. S. (1998). Confirmation bias: a ubiquitous phenomenon in many guises. *Review of  
620 General Psychology*, *2*(2), 175–220.
- 621 Pavlidis, P., Laurent, S., & Stephan, W. (2010). MsABC: A modification of Hudson’s ms to  
622 facilitate multi-locus ABC analysis. *Molecular Ecology Resources*, *10*(4), 723–727.  
623 <https://doi.org/10.1111/j.1755-0998.2010.02832.x>
- 624 Pelletier, T. A., & Carstens, B. C. (2014). Model choice for phylogeographic inference using a  
625 large set of models. *Molecular Ecology*, *23*(12), 3028–3043.  
626 <https://doi.org/10.1111/mec.12722>
- 627 Prado, C. P. A., Haddad, C. F. B., & Zamudio, K. . (2012). Cryptic lineages and Pleistocene  
628 population expansion in a Brazilian Cerrado frog. *Molecular Ecology*, *21*(4), 921–941.  
629 <https://doi.org/10.1111/j.1365-294X.2011.05409.x>
- 630 Prado, D. E., & Gibbs, P. E. . (1993). Patterns of Species Distributions in the Dry Seasonal  
631 Forests of South America. *Annals of the Missouri Botanical Garden*, *80*(4), 902–927.
- 632 Pritchard, J. K., Seielstad, M. T., Perez-Lezaun, A., & Feldman, M. W. (1999). Population  
633 growth of human Y chromosomes: A study of y chromosome microsatellites. *Molecular  
634 Biology and Evolution*, *16*(12), 1791–1798.  
635 <https://doi.org/10.1093/oxfordjournals.molbev.a026091>
- 636 Pritchard, J. K., Stephens, M., & Donnelly, P. (2000). Inference of population structure using  
637 multilocus genotype data. *Genetics*, *155*, 945–959. <https://doi.org/10.1007/s10681-008-9788-0>
- 638
- 639 Pudlo, P., Marin, J. M., Estoup, A., Cornuet, J. M., Gautier, M., & Robert, C. P. (2016). Reliable  
640 ABC model choice via random forests. *Bioinformatics*, *32*(6), 859–866.  
641 <https://doi.org/10.1093/bioinformatics/btv684>
- 642 Razzak, M. I., Naz, S., & Zaib, A. (2018). Deep Learning for Medical Image Processing:  
643 Overview, Challenges and the Future BT - Classification in BioApps: Automation of  
644 Decision Making. *Springer*, 323–350. [https://doi.org/10.1007/978-3-319-65981-7\\_12](https://doi.org/10.1007/978-3-319-65981-7_12)
- 645 Ribeiro, M. A. (2015). Catalogue of distribution of lizards (Reptilia: Squamata) from the  
646 Brazilian Amazonia. I. Dactyloidae, Hoplocercidae, Iguanidae, Leiosauridae, Polychrotidae,  
647 Tropiduridae. In *Zootaxa* (Vol. 3983, Issue 1). <https://doi.org/10.11646/zootaxa.3983.1.1>
- 648 Santos, M. G., Nogueira, C., Giugliano, L. G., & Colli, G. R. (2014). Landscape evolution and  
649 phylogeography of *Micrablepharus atticolus* (Squamata, Gymnophthalmidae), an endemic  
650 lizard of the Brazilian Cerrado. *Journal of Biogeography*, *41*(8), 1506–1519.  
651 <https://doi.org/10.1111/jbi.12291>

- 652 Schridder, D. R., & Kern, A. D. (2018). Supervised Machine Learning for Population Genetics: A  
653 New Paradigm. *Trends in Genetics*, 34(4), 301–312.  
654 <https://doi.org/10.1016/j.tig.2017.12.005>
- 655 Silva, S. M., Townsend Peterson, A., Carneiro, L., Burlamaqui, T. C. T., Ribas, C. C., Sousa-  
656 Neves, T., Miranda, L. S., Fernandes, A. M., D’Horta, F. M., Araújo-Silva, L. E., Batista,  
657 R., Bandeira, C. H. M. M., Dantas, S. M., Ferreira, M., Martins, D. M., Oliveira, J., Rocha,  
658 T. C., Sardelli, C. H., Thom, G., ... Aleixo, A. (2019). A dynamic continental moisture  
659 gradient drove Amazonian bird diversification. *Science Advances*, 5(7).  
660 <https://doi.org/10.1126/sciadv.aat5752>
- 661 Smith, M. L., & Carstens, B. C. (2020). Process-based species delimitation leads to identification  
662 of more biologically relevant species. *Evolution*, 74(2), 216–229.  
663 <https://doi.org/10.1111/evo.13878>
- 664 Smith, M. L., Ruffley, M., Espíndola, A., Tank, D. C., Sullivan, J., & Carstens, B. C. (2017).  
665 Demographic model selection using random forests and the site frequency spectrum.  
666 *Molecular Ecology*, 26(17), 4562–4573. <https://doi.org/10.1111/mec.14223>
- 667 Thomé, M. T. C., & Carstens, B. C. (2016). Phylogeographic model selection leads to insight into  
668 the evolutionary history of four-eyed frogs. *Proceedings of the National Academy of  
669 Sciences of the United States of America*, 113(29), 8010–8017.  
670 <https://doi.org/10.1073/pnas.1601064113>
- 671 Thomé, M. T. C., Zamudio, K. R., Giovanelli, J. G. R., Haddad, C. F. B., Baldissera, F. A., &  
672 Alexandrino, J. (2010). Phylogeography of endemic toads and post-Pliocene persistence of  
673 the Brazilian Atlantic Forest. *Molecular Phylogenetics and Evolution*, 55(3), 1018–1031.  
674 <https://doi.org/10.1016/j.ympev.2010.02.003>
- 675 Pennington, T.R., Prado, D. E., & Pendry, C. A. (2000). Neotropical seasonally dry forests and  
676 Quaternary vegetation changes. *Journal of Biogeography*, 27(2), 261–273.  
677 <https://doi.org/10.1046/j.1365-2699.2000.00397.x>
- 678 Vanzolini, P., & Williams, E. (1970). South american anoles: the geographic differentiation and  
679 evolution of the anolis *Chrysolepis* species group (Sauria, Iguanidae). *Arquivos De  
680 Zoologia*, 19(3-4.), 125–298.
- 681 Wang, X., Edwards, R. L., Auler, A. S., Cheng, H., Kong, X., Wang, Y., Cruz, F. W., Dorale, J.  
682 A., & Chiang, H. W. (2017). Hydroclimate changes across the Amazon lowlands over the  
683 past 45,000 years. *Nature*, 541(7636), 204–207. <https://doi.org/10.1038/nature20787>
- 684 Werneck, F. P., & Colli, G. R. (2006). The lizard assemblage from seasonally dry tropical forest  
685 enclaves in the Cerrado biome, Brazil, and its association with the Pleistocenic Arc. *Journal  
686 of Biogeography*, 33(11), 1983–1992. <https://doi.org/10.1111/j.1365-2699.2006.01553.x>
- 687 Werneck, F. P., Costa, G. C., Colli, G. R., Prado, D. E., & Sites, J. W. (2011). Revisiting the  
688 historical distribution of Seasonally Dry Tropical Forests: New insights based on  
689 palaeodistribution modelling and palynological evidence. *Global Ecology and  
690 Biogeography*, 20(2), 272–288. <https://doi.org/10.1111/j.1466-8238.2010.00596.x>

691 **FIGURE LEGENDS**

692

693 **Figure 1.** Schematic representation of a 2D convolutional neural network (CNN) architecture. (a)  
694 input image; (b) array derived from the input image; (c) convolutional kernel (yellow); (d) feature  
695 map; (e) pooling kernel (orange). ANN = artificial neural network.

696

697 **Figure 2.** Map showing the geographic distribution of sampled localities. Purple circle = *Norops*  
698 *brasilinesis* (population 1); blue circles = *N. brasilinesis* (population 2); red circles = *N.*  
699 *brasilinesis* (population 3); green circles = *Norops planiceps*. Bar represents the genetic structure  
700 of *Norops* ssp. across the area of study according to STRUCTURE analysis.

701

702 **Figure 3.** Representation of the models tested using convolutional neural networks. (a) set of  
703 three models used to test population trajectory through time; (b) set of 26 models used to test the  
704 evolutionary relationships and secondary contact of *Norops* ssp. Numbers and colors represent  
705 populations recovered in STRUCTURE analysis. Purple circle = *Norops brasilinesis* (population  
706 1); blue circles = *N. brasilinesis* (population 2); red circles = *N. brasilinesis* (population 3); green  
707 circles = *Norops planiceps*. Gene between populations 2 and 3 is represented by arrows. The  
708 best-supported model for CNN in the second part of comparison is marked by a red box.

709

710 **Figure 4.** Confusion matrices measuring the accuracy of the trained CNNs model on the test  
711 dataset to detect demographic changes through time. Numbers represent percentages, which were  
712 calculated based on 2,000 images for each model. (a) *Norops brasilinesis* (population 1); (b) *N.*  
713 *brasilinesis* (population 2); *N. brasilinesis* (population 3); *N. planiceps*.

714

715 **Figure 5.** Confusion matrices measuring the accuracy of the trained CNNs model on the test  
716 dataset of 26 phylogeographic models. Numbers represent percentages, which were calculated  
717 based on 2,000 images for each model.

718 **Table 1.** A glossary of terms used in this study.

| <b>Term</b>                      | <b>Definition</b>                                                                                                                                                        |
|----------------------------------|--------------------------------------------------------------------------------------------------------------------------------------------------------------------------|
| Artificial neural network-ANN    | a model of connected layers that attempt to mimic the way that the brain analyzes and processes information                                                              |
| Convolutional neural network-CNN | a type of artificial neural network used for image classification and recognition                                                                                        |
| CNN architecture                 | the general structure of the model that includes the number of convolution and pooling layers, size and numbers kernels, and the number of neurons in each hidden layer. |
| Kernel                           | vector of weights used for feature detection                                                                                                                             |
| Neuron                           | a mathematical function that takes a group of input and weights, applies an activation function (e.g., ReLU, tanh, sigmoid) and output a value                           |
| Loss function                    | a method to evaluate how well the model describe the dataset                                                                                                             |
| Epoch                            | the number of times that all images are fed into the model                                                                                                               |
| Optimizer                        | a mathematical function used to update the weights of the model to minimize the loss function                                                                            |

719

720 **Table 2.** The probability of each model tested using convolutional neural networks and  
 721 approximate Bayesian computation. Comparisons were first performed within part 1 only using  
 722 CNNs, and subsequently, models in part 2 were constructed based on demographic scenario  
 723 inferred in part 1. The best-fit model selected in each part is highlighted in bold.

| <b>Part 1</b>                          |                         | <b>Part 2</b> |                         |                                  |
|----------------------------------------|-------------------------|---------------|-------------------------|----------------------------------|
| <b>Model</b>                           | <b>CNNs Probability</b> | <b>Model</b>  | <b>CNNs probability</b> | <b>ABC posterior probability</b> |
| <b>Population 1 - Constant</b>         | <b>0.985</b>            | Model 1       | 0                       | 0.033                            |
| Population 1 - Expansion               | 0.015                   | Model 2       | 0                       | 0.035                            |
| Population 1 - Bottleneck              | 0                       | Model 3       | 0                       | 0.025                            |
|                                        |                         | Model 4       | 0                       | 0.11                             |
|                                        |                         | Model 5       | 0                       | 0.11                             |
| Population 2 - Constant                | 0.41                    | Model 6       | 0                       | 0                                |
| <b>Population 2 - Expansion</b>        | <b>0.59</b>             | Model 7       | 0                       | 0.1                              |
| Population 2 - Bottleneck              | 0                       | Model 8       | 0                       | 0.008                            |
|                                        |                         | Model 9       | 0                       | 0.007                            |
|                                        |                         | Model 10      | 0.01                    | 0                                |
| Population 3 - Constant                | 0                       | Model 11      | 0                       | 0                                |
| <b>Population 3 - Expansion</b>        | <b>1.0</b>              | Model 12      | 0                       | 0.007                            |
| Population 3 - Bottleneck              | 0                       | Model 13      | 0                       | 0                                |
|                                        |                         | Model 14      | 0                       | 0                                |
|                                        |                         | Model 15      | 0                       | 0                                |
| <i>N. planiceps</i> - Constant         | 0.01                    | Model 16      | 0                       | <b>0.15</b>                      |
| <b><i>N. planiceps</i> - Expansion</b> | <b>0.99</b>             | Model 17      | 0                       | <b>0.15</b>                      |
| <i>N. planiceps</i> - Bottleneck       | 0                       | Model 18      | 0                       | 0.037                            |
|                                        |                         | Model 19      | 0                       | 0.038                            |
|                                        |                         | Model 20      | 0                       | 0.0134                           |
|                                        |                         | Model 21      | 0                       | 0.022                            |
|                                        |                         | Model 22      | <b>0.79</b>             | 0.060                            |
|                                        |                         | Model 23      | 0                       | 0.0046                           |
|                                        |                         | Model 24      | 0                       | 0.012                            |
|                                        |                         | Model 25      | 0                       | 0.013                            |
|                                        |                         | Model 26      | 0.20                    | 0.065                            |

724

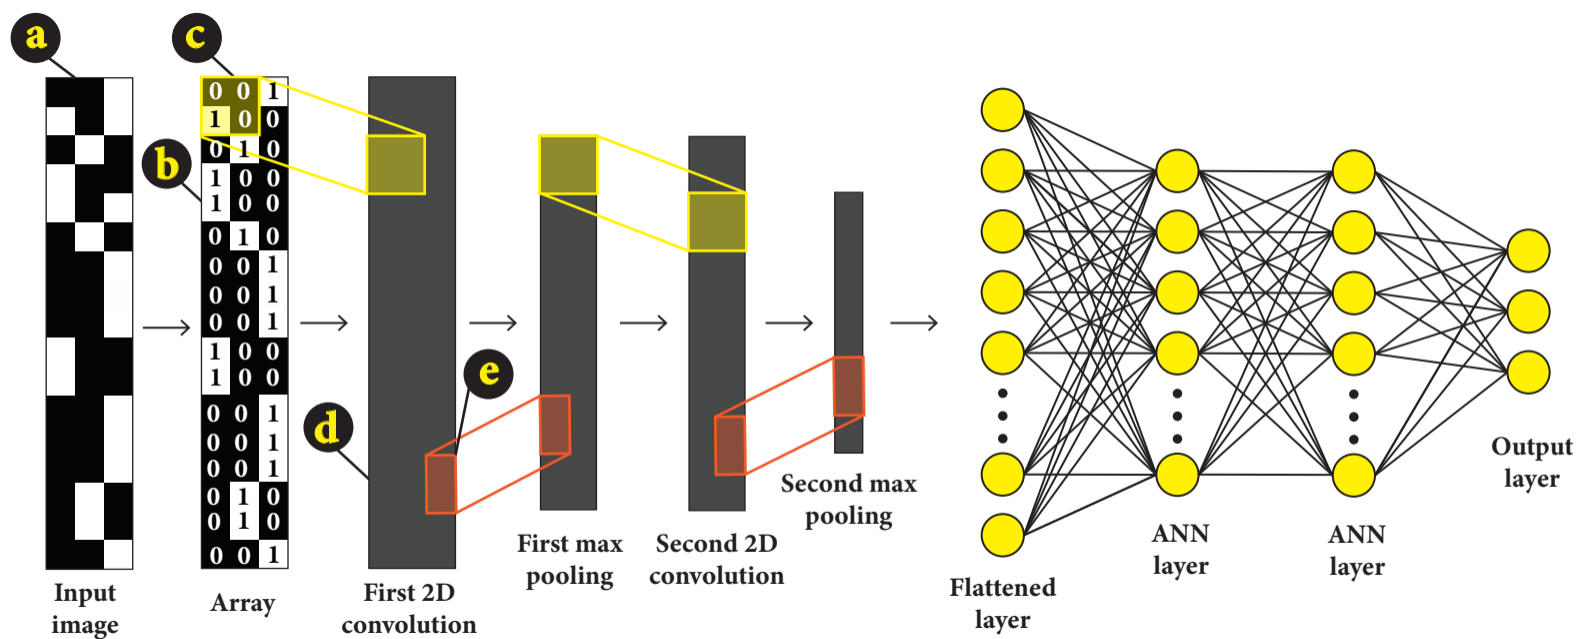

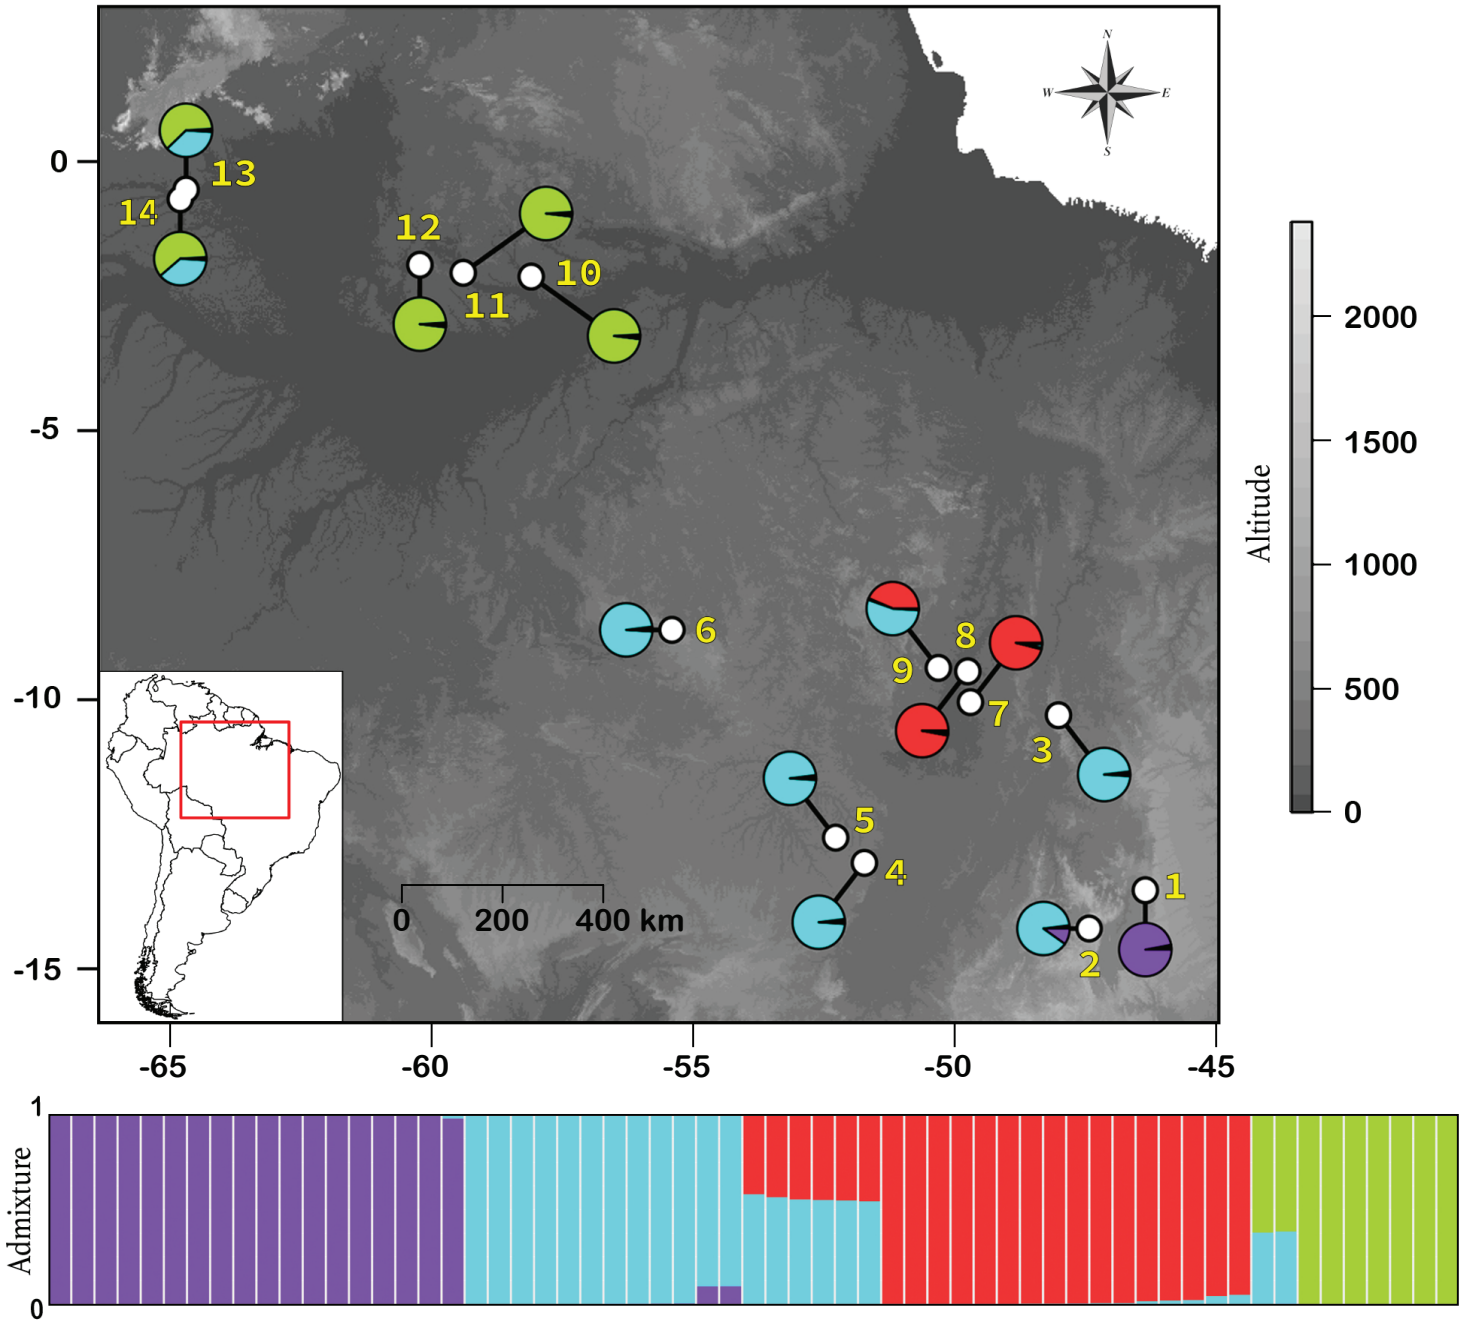



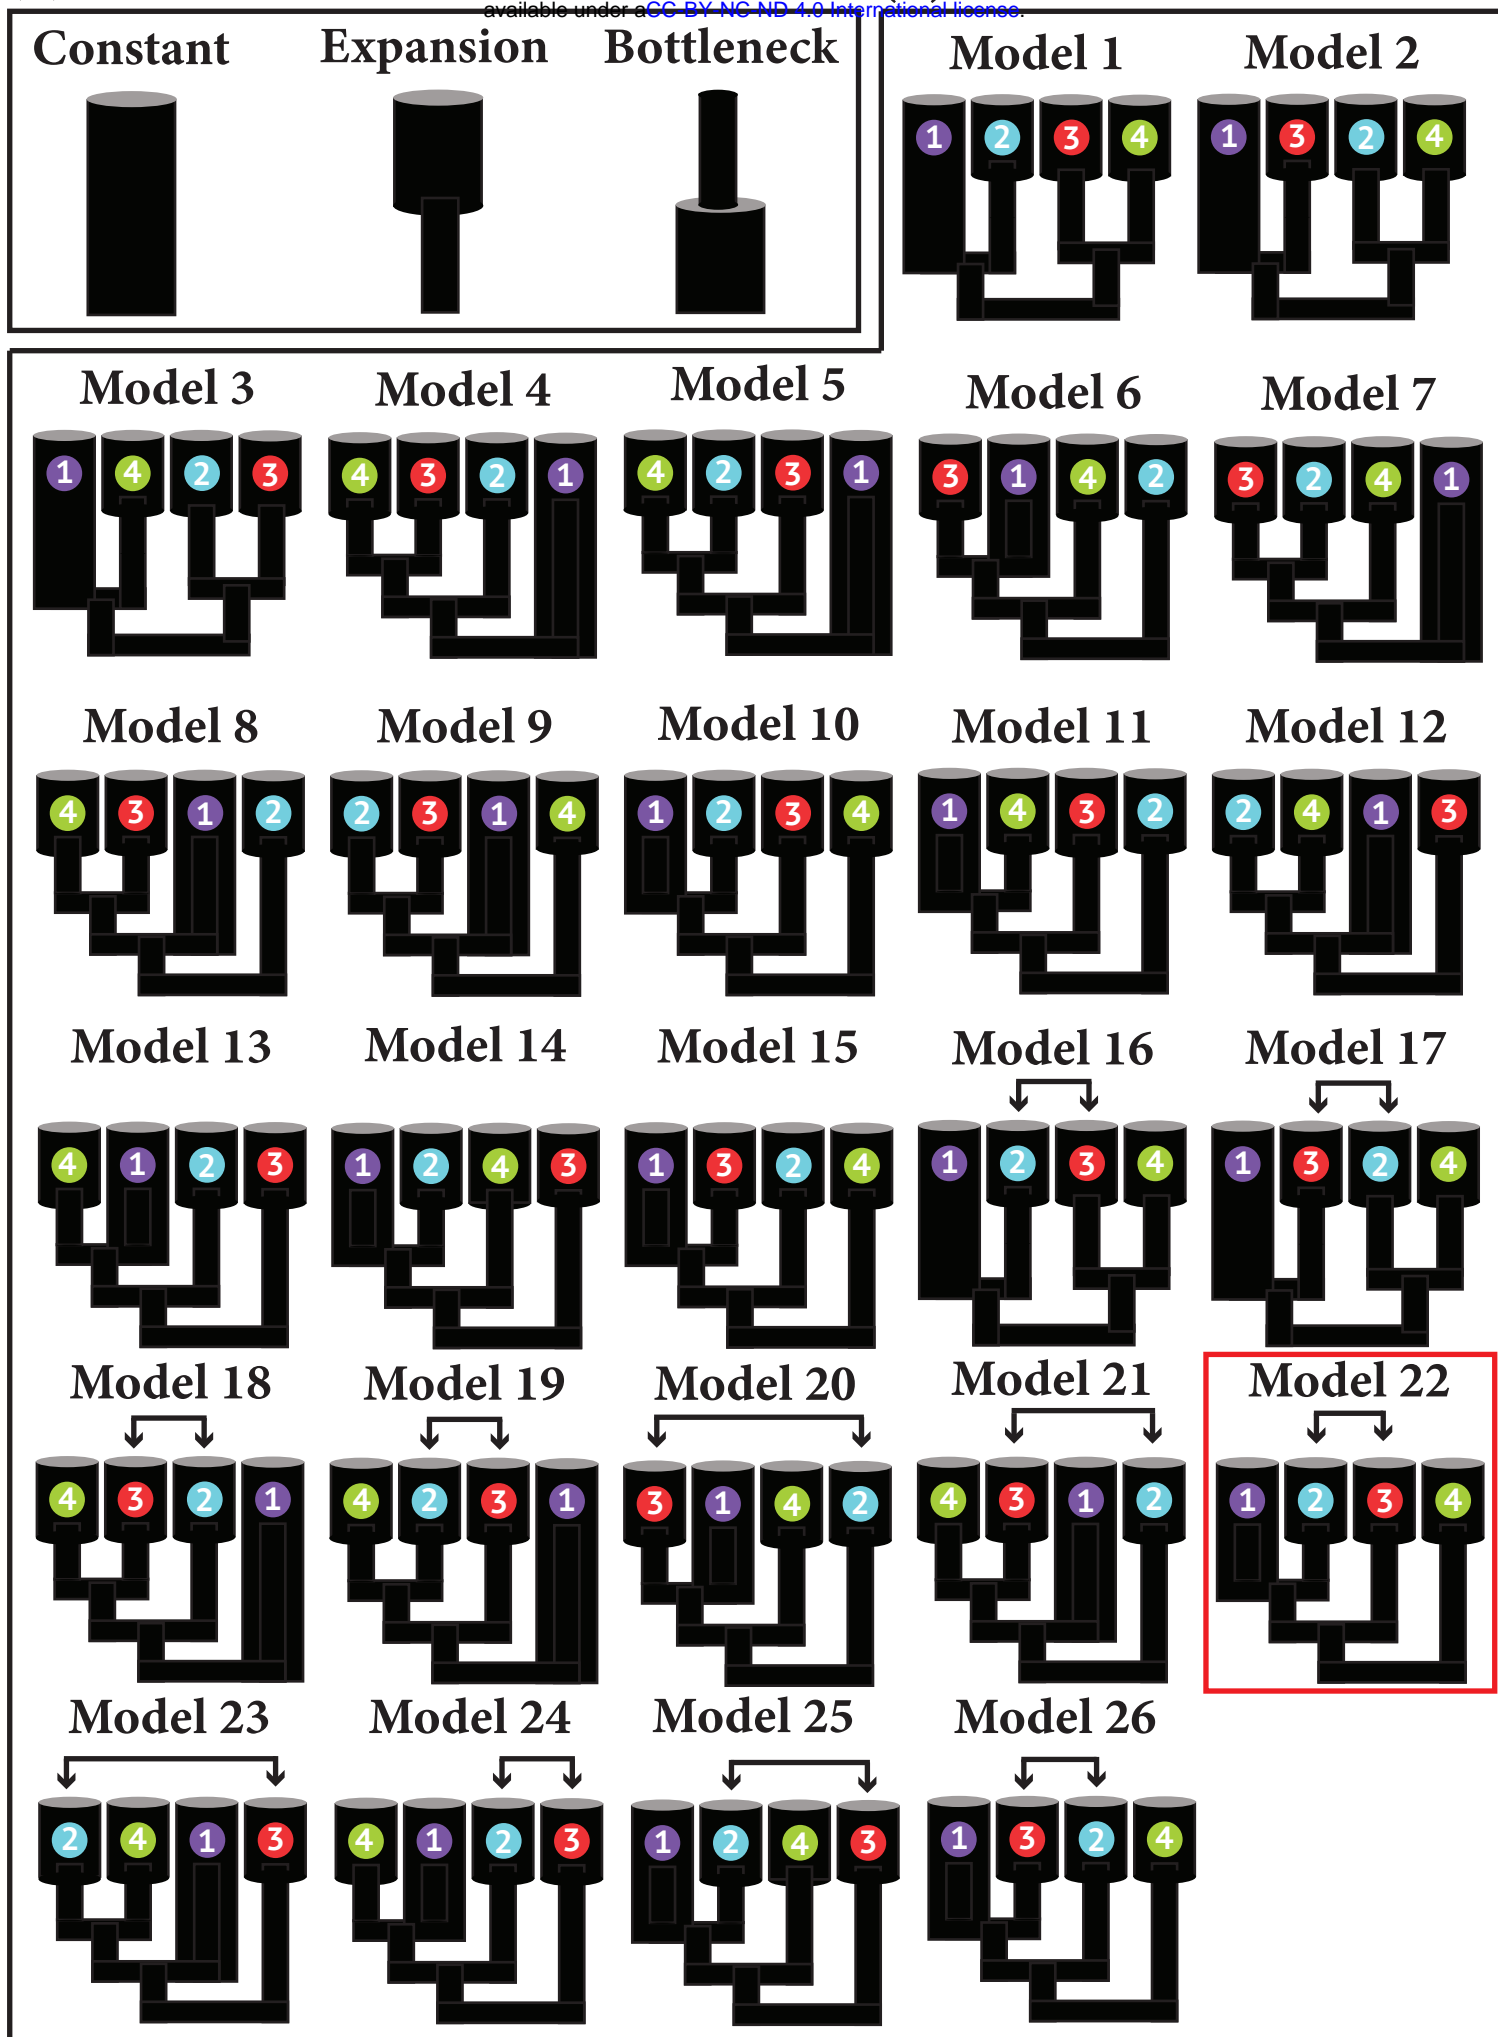

**(a)**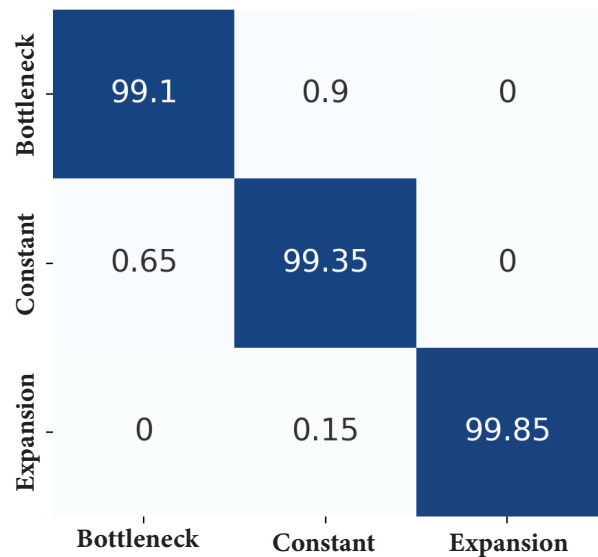**(b)**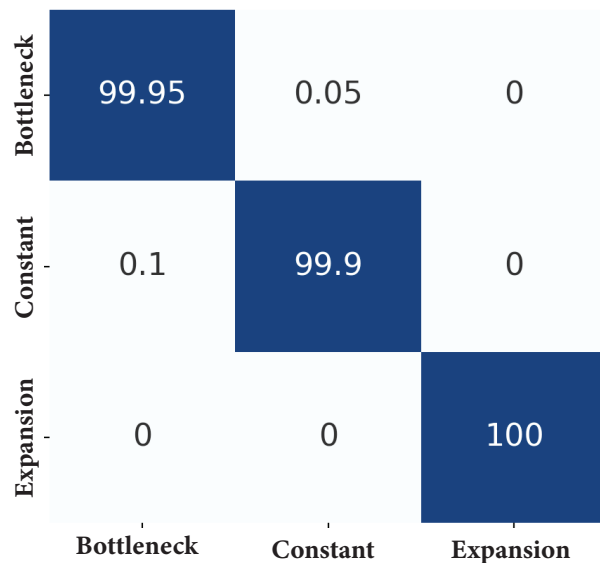**(c)**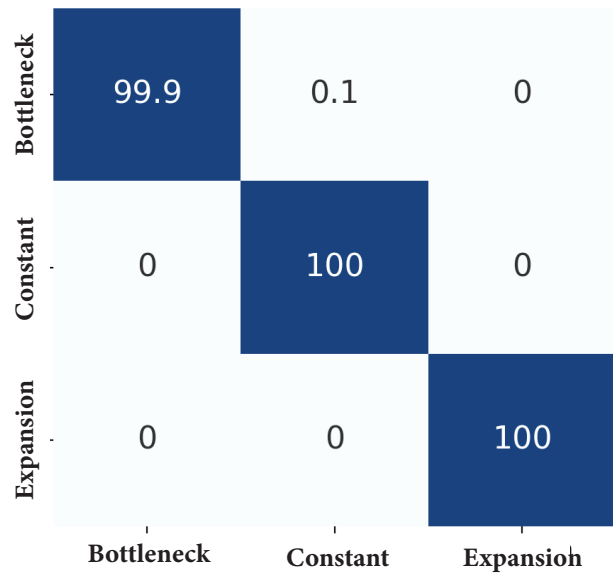**(d)**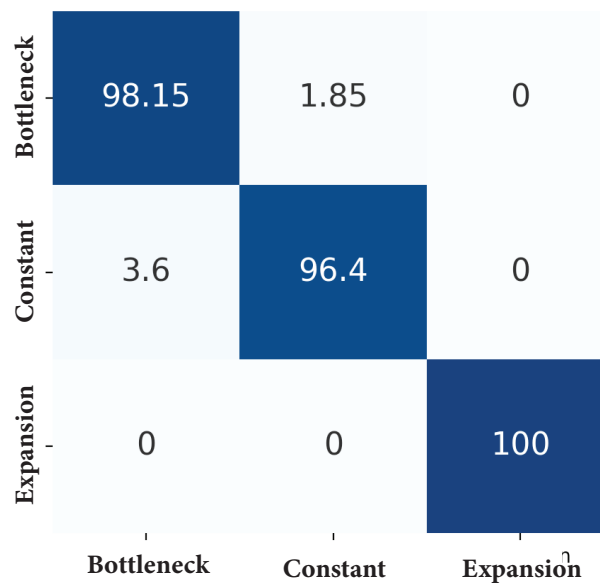

|          | Model 1 | Model 2 | Model 3 | Model 4 | Model 5 | Model 6 | Model 7 | Model 8 | Model 9 | Model 10 | Model 11 | Model 12 | Model 13 | Model 14 | Model 15 | Model 16 | Model 17 | Model 18 | Model 19 | Model 20 | Model 21 | Model 22 | Model 23 | Model 24 | Model 25 | Model 26 |   |
|----------|---------|---------|---------|---------|---------|---------|---------|---------|---------|----------|----------|----------|----------|----------|----------|----------|----------|----------|----------|----------|----------|----------|----------|----------|----------|----------|---|
| Model 1  | 97.15   | 0       | 0       | 0.2     | 0       | 0       | 0       | 0.9     | 0       | 0.05     | 0        | 0        | 0        | 0        | 0        | 1.35     | 0        | 0        | 0        | 0        | 0.3      | 0        | 0        | 0        | 0.05     | 0        |   |
| Model 2  | 0       | 76.35   | 0       | 0       | 0.05    | 0       | 0       | 0       | 0       | 0        | 0        | 0.2      | 0        | 0        | 0        | 0        | 23.2     | 0        | 0        | 0        | 0        | 0        | 0.2      | 0        | 0        | 0        |   |
| Model 3  | 0       | 0       | 98.25   | 0       | 0       | 0       | 0.3     | 0       | 0       | 0        | 0.15     | 0        | 0        | 0        | 0        | 0        | 0        | 0        | 0        | 0.4      | 0.35     | 0        | 0.5      | 0        | 0.05     | 0        |   |
| Model 4  | 0       | 0       | 0       | 98.55   | 0       | 0       | 0       | 1.15    | 0       | 0        | 0        | 0        | 0        | 0        | 0        | 0        | 0        | 0.15     | 0        | 0        | 0.15     | 0        | 0        | 0        | 0        | 0        |   |
| Model 5  | 0       | 0.05    | 0       | 0       | 86.4    | 0       | 0       | 0       | 0       | 0        | 0        | 0.1      | 0        | 0        | 0        | 0        | 0.15     | 0        | 13       | 0        | 0        | 0        | 0.3      | 0        | 0        | 0        |   |
| Model 6  | 0       | 0.05    | 0       | 0       | 0       | 95.3    | 0       | 0.1     | 0.2     | 0        | 0        | 0        | 0        | 0        | 0        | 0.35     | 0        | 0.1      | 0        | 0        | 3.9      | 0        | 0        | 0        | 0        | 0        |   |
| Model 7  | 0       | 0       | 0.25    | 0.05    | 0       | 0       | 96.75   | 0       | 0       | 0        | 0.55     | 0        | 0        | 0        | 0        | 0.05     | 0.05     | 0        | 2.2      | 0.05     | 0        | 0        | 0.05     | 0        | 0        | 0        |   |
| Model 8  | 0.05    | 0       | 0       | 2.25    | 0       | 0       | 0       | 95.55   | 0.15    | 0        | 0        | 0        | 0        | 0        | 0        | 0        | 0        | 0        | 0        | 0        | 2        | 0        | 0        | 0        | 0        | 0        |   |
| Model 9  | 0       | 0       | 0       | 0       | 0       | 0.2     | 0       | 0.1     | 99.5    | 0        | 0        | 0        | 0        | 0        | 0        | 0        | 0        | 0        | 0        | 0.2      | 0        | 0        | 0        | 0        | 0        | 0        |   |
| Model 10 | 0       | 0       | 0       | 0       | 0       | 0       | 0       | 0       | 0       | 94       | 0        | 0        | 0        | 0        | 0        | 0.8      | 0        | 0        | 0        | 0        | 0        | 5.15     | 0        | 0        | 0        | 0.05     |   |
| Model 11 | 0       | 0       | 0.3     | 0       | 0       | 0       | 1       | 0       | 0       | 0        | 96.85    | 0        | 0        | 0        | 0        | 0.05     | 0.2      | 0        | 0        | 0        | 0.05     | 1.2      | 0        | 0        | 0.15     | 0.2      |   |
| Model 12 | 0       | 0.2     | 0       | 0       | 0.45    | 0       | 0       | 0       | 0       | 0        | 0        | 84.15    | 0.05     | 0.2      | 0        | 0        | 0.25     | 0        | 0.05     | 0        | 0        | 0        | 14.6     | 0.05     | 0        | 0        |   |
| Model 13 | 0       | 0       | 0       | 0       | 0       | 0       | 0       | 0       | 0.5     | 0        | 0        | 0        | 91.4     | 1.3      | 0        | 0        | 0        | 0        | 0        | 0        | 0        | 0        | 0.1      | 6.4      | 0.3      | 0        |   |
| Model 14 | 0       | 0       | 0       | 0       | 0       | 0       | 0       | 0       | 0       | 0.25     | 0        | 0.05     | 0.35     | 98.2     | 0        | 0        | 0        | 0        | 0        | 0        | 0        | 0        | 0        | 0        | 0        | 1.15     | 0 |
| Model 15 | 0       | 0       | 0       | 0       | 0       | 0.05    | 0       | 0       | 0       | 0.15     | 0        | 0        | 0        | 0        | 95.65    | 0        | 0.7      | 0        | 0        | 0        | 0        | 0.35     | 0        | 0        | 0        | 3.1      |   |
| Model 16 | 8.05    | 0       | 0.1     | 0.15    | 0       | 0       | 0.9     | 0.1     | 0       | 1.65     | 0.3      | 0        | 0        | 0        | 0        | 80.65    | 1.55     | 0.05     | 0        | 0.15     | 3.25     | 2        | 0.5      | 0        | 0.35     | 0.25     |   |
| Model 17 | 0       | 16      | 0.2     | 0       | 0.05    | 0.05    | 0.3     | 0       | 0       | 0        | 0.2      | 0.05     | 0        | 0        | 2        | 1.4      | 76.15    | 0        | 0.4      | 0.7      | 0.3      | 0        | 1.6      | 0        | 0.05     | 0.55     |   |
| Model 18 | 0       | 0       | 0       | 0.05    | 0       | 0       | 0       | 0       | 0       | 0        | 0        | 0        | 0        | 0        | 0        | 0        | 0        | 99.85    | 0        | 0        | 0.1      | 0        | 0        | 0        | 0        | 0        |   |
| Model 19 | 0       | 0       | 0       | 0.15    | 22.9    | 0       | 3.35    | 0       | 0       | 0        | 0        | 0.1      | 0        | 0        | 0        | 0        | 0.3      | 0.15     | 71.1     | 0        | 0.2      | 0        | 1.75     | 0        | 0        | 0        |   |
| Model 20 | 0       | 0       | 0.2     | 0       | 0       | 12.3    | 0       | 0       | 0.9     | 0        | 0.1      | 0        | 0        | 0        | 0.65     | 0.3      | 1.1      | 0        | 0        | 81.75    | 1        | 0        | 0.1      | 0.3      | 0.3      | 1        |   |
| Model 21 | 0.05    | 0       | 0.3     | 0.95    | 0       | 0       | 0.4     | 18.2    | 0.15    | 0        | 0.05     | 0        | 0        | 0        | 0        | 0.85     | 0.3      | 0.25     | 0.5      | 1.8      | 75.45    | 0        | 0.65     | 0.05     | 0.05     | 0        |   |
| Model 22 | 0       | 0       | 0       | 0       | 0       | 0       | 0       | 0       | 0       | 18.15    | 1.1      | 0        | 0        | 0        | 0.2      | 1.75     | 0.1      | 0        | 0        | 0        | 0        | 76.8     | 0        | 0        | 0.55     | 1.35     |   |
| Model 23 | 0       | 0.05    | 0.8     | 0       | 0.65    | 0       | 0.25    | 0       | 0       | 0        | 0        | 9.7      | 0.2      | 0.1      | 0        | 0.1      | 1.6      | 0.05     | 2        | 0.05     | 0.35     | 0        | 82.35    | 1.1      | 0.65     | 0        |   |
| Model 24 | 0       | 0       | 3.65    | 0       | 0       | 0       | 0       | 0       | 0.2     | 0        | 0        | 0        | 13.05    | 0.4      | 0        | 0.05     | 0.05     | 0        | 0        | 0.9      | 0.35     | 0        | 1.7      | 76.75    | 2.9      | 0        |   |
| Model 25 | 0       | 0       | 0.75    | 0       | 0       | 0       | 0       | 0       | 0       | 0.3      | 0.2      | 0        | 1.4      | 15.9     | 0        | 0.45     | 0        | 0        | 0        | 0.5      | 0        | 0.75     | 1.1      | 4.15     | 74.5     | 0        |   |
| Model 26 | 0       | 0       | 0       | 0       | 0       | 0       | 0       | 0       | 0       | 0.05     | 1.15     | 0        | 0        | 0        | 26       | 0.35     | 1.4      | 0        | 0        | 0.2      | 0        | 9.35     | 0        | 0        | 0        | 61.5     |   |
